# Supplementary material for: Characterization of Five Transmembrane Proteins: With Focus on the Tweety, Sideroflexin, and YIP1 Domain Families
Source: PubMed Central journal article supplement (PMC8327215; doi:10.3389/fcell.2021.708754), 2021-07-19
Supplement: Table_1.pdf [file Table_1.pdf]

Supplementary Table 1. Gene-disease associations.

| <b>Gene</b>         | <b>Potential involvement in diseases</b>                                                                                      | <b>Reference</b>                                              |
|---------------------|-------------------------------------------------------------------------------------------------------------------------------|---------------------------------------------------------------|
| SFXN1               | May be involved in cancer cell growth; sub-expressed in Alzheimer's, depression and dementia                                  | (Minjarez et al., 2016; Fang et al., 2018; Kory et al., 2018) |
| SFXN2               | May be involved in cancer cell growth                                                                                         | (Kory et al., 2018)                                           |
| SFXN3               | May be involved in cancer cell growth                                                                                         | (Labuschagne et al., 2014; Kory et al., 2018)                 |
| SFXN4               | Mitochondrial disorders, complex I deficiency, macrocytic anemia, optic nerve hypoplasia                                      | (Sofou et al., 2019)                                          |
| TTYH1, TTYH2, TTYH3 | Potentially associated with cerebral edema following excessive oxidative stress, ischemia, traumatic brain injury, and glioma | (Han et al., 2019)                                            |
| TTYH2               | Renal cell carcinoma, colon cancer                                                                                            | (Rae et al., 2001; Toyama et al., 2007)                       |
| YIPF1A, YIPF1B      | Possibly linked to motor neuron degeneration in amyotrophic lateral sclerosis type 8                                          | (Kuijpers et al., 2013)                                       |
| YIPF4               | Potential interaction with human papillomaviruses                                                                             | (Shaik et al., 2019)                                          |
| YIPF6               | Prostate cancer                                                                                                               | (Djusberg et al., 2017)                                       |
| ARV1                | Epilepsy, intellectual disabilities                                                                                           | (Piñero et al., 2020)                                         |
| EBP                 | Cataracts, musculoskeletal diseases, intellectual disabilities                                                                | (Piñero et al., 2020)                                         |
| DAGLA               | Neurodegenerative disorders                                                                                                   | (Piñero et al., 2020)                                         |
| DUOXA2              | Thyroid disorders                                                                                                             | (Piñero et al., 2020)                                         |
| PROM1               | Macular degeneration, glioblastoma neoplasms                                                                                  | (Piñero et al., 2020)                                         |
| OXA1L               | Mitochondrial diseases                                                                                                        | (Piñero et al., 2020)                                         |

## References

Djusberg, E., Jernberg, E., Thysell, E., Golovleva, I., Lundberg, P., Crnalic, S., et al. (2017). High levels of the AR-V7 Splice Variant and Co-Amplification of the Golgi Protein

- Coding YIPF6 in AR Amplified Prostate Cancer Bone Metastases. *The Prostate* 77, 625–638. doi:10.1002/pros.23307.
- Fang, Y.-Y., Zeng, P., Qu, N., Ning, L.-N., Chu, J., Zhang, T., et al. (2018). Evidence of altered depression and dementia-related proteins in the brains of young rats after ovariectomy. *J. Neurochem.* 146, 703–721. doi:10.1111/jnc.14537.
- Han, Y.-E., Kwon, J., Won, J., An, H., Jang, M. W., Woo, J., et al. (2019). Tweety-homolog (Ttyh) Family Encodes the Pore-forming Subunits of the Swelling-dependent Volume-regulated Anion Channel (VRAC<sub>swell</sub>) in the Brain. *Exp. Neurobiol.* 28, 183–215. doi:10.5607/en.2019.28.2.183.
- Kory, N., Wyant, G. A., Prakash, G., Bos, J. uit de, Bottanelli, F., Pacold, M. E., et al. (2018). SFXN1 is a mitochondrial serine transporter required for one-carbon metabolism. *Science* 362. doi:10.1126/science.aat9528.
- Kuijpers, M., Yu, K. L., Teuling, E., Akhmanova, A., Jaarsma, D., and Hoogenraad, C. C. (2013). The ALS8 protein VAPB interacts with the ER–Golgi recycling protein YIF1A and regulates membrane delivery into dendrites. *EMBO J.* 32, 2056–2072. doi:10.1038/emboj.2013.131.
- Labuschagne, C. F., van den Broek, N. J. F., Mackay, G. M., Vousden, K. H., and Maddocks, O. D. K. (2014). Serine, but Not Glycine, Supports One-Carbon Metabolism and Proliferation of Cancer Cells. *Cell Rep.* 7, 1248–1258. doi:10.1016/j.celrep.2014.04.045.
- Minjarez, B., Calderón-González, K. G., Rustarazo, Ma. L. V., Herrera-Aguirre, M. E., Labra-Barrios, M. L., Rincon-Limas, D. E., et al. (2016). Identification of proteins that are differentially expressed in brains with Alzheimer’s disease using iTRAQ labeling and tandem mass spectrometry. *J. Proteomics* 139, 103–121. doi:10.1016/j.jprot.2016.03.022.
- Piñero, J., Ramírez-Anguita, J. M., Saüch-Pitarch, J., Ronzano, F., Centeno, E., Sanz, F., et al. (2020). The DisGeNET knowledge platform for disease genomics: 2019 update. *Nucleic Acids Res.* 48, D845–D855. doi:10.1093/nar/gkz1021.
- Rae, F. K., Hooper, J. D., Eyre, H. J., Sutherland, G. R., Nicol, D. L., and Clements, J. A. (2001). TTYH2, a human homologue of the *Drosophila melanogaster* gene tweety, is located on 17q24 and upregulated in renal cell carcinoma. *Genomics* 77, 200–207. doi:10.1006/geno.2001.6629.
- Shaik, S., Pandey, H., Thirumalasetti, S. K., and Nakamura, N. (2019). Characteristics and Functions of the Yip1 Domain Family (YIPF), Multi-Span Transmembrane Proteins Mainly Localized to the Golgi Apparatus. *Front. Cell Dev. Biol.* 7. doi:10.3389/fcell.2019.00130.
- Sofou, K., Hedberg-Oldfors, C., Kollberg, G., Thomsen, C., Wiksell, Å., Oldfors, A., et al. (2019). Prenatal onset of mitochondrial disease is associated with sideroflexin 4 deficiency. *Mitochondrion* 47, 76–81. doi:10.1016/j.mito.2019.04.012.
- Toiyama, Y., Mizoguchi, A., Kimura, K., Hiro, J., Inoue, Y., Tutumi, T., et al. (2007). TTYH2, a human homologue of the *Drosophila melanogaster* gene tweety, is up-

regulated in colon carcinoma and involved in cell proliferation and cell aggregation.  
*World J. Gastroenterol. WJG* 13, 2717–2721. doi:10.3748/wjg.v13.i19.2717.
